# Supplementary material for: Alarm communication predates eusociality in termites
Source: Research Square preprint supplement (doi:10.21203/rs.3.rs-1869980/v1), 2022-07-28
Supplement: Supplementary file 1 [file 6eba58556186bfe120e740b3.xlsx]

## Sheet: Table S1
	Species	Family/Sub-family	Distribution	Country of collection and/or literature references for alarm characters	Species code	Caste ratio in experimental groups (Workers/Soldiers)	Tremulation in Workers	Drumming in Workers	Tremulation in Soldiers	Drumming in Soldiers	Drumming with Abdomen in Workers	Drumming with Head in Workers	Drumming with Abdomen in Soldiers	Drumming with Head in Soldiers	Low Tremulations in Workers	High Tremulations in Workers	Multiple Bursts in one Sequence in Workers	Low Tremulations in Soldiers	High Tremulations in Soldiers	Multiple Bursts in one Sequence in Soldiers	Soldier Mandible Openings after disturbance	Chemical alarm	Worker response to Chemical alarm by Running	Soldiers response to Chemical alarm by Running	Worker response to Chemical alarm by Vibrating	Soldier response to Chemical alarm by Vibrating	Body Size difference between workers(W) and soldiers (S)	Size of the Colony 10X	Nest material	Food hardness	Foraging area	Ontogenetic pattern	Worker subcastes	Soldier subcastes	Overall polymorphism	Life type	Diet	Body size category	Soldier proportion	Family
							X1	X2	X3	X4	X5	X6	X7	X8	X9	X10	X11	X12	X13	X14	X15	X16	X17	X18	X19	X20	X21	X22	X23	X24	X25	X26	X27	X28	X29	X30	X31	X32	X33	X34
							Absent (0) / Present (1)	Absent (0) / Present (1)	Absent (0) / Present (1)	Absent (0) / Present (1)	Absent (0) / Present (1)	Absent (0) / Present (1)	Absent (0) / Present (1)	Absent (0) / Present (1)	Absent (0) / Present (1)	Absent (0) / Present (1)	Absent (0) / Present (1)	Absent (0) / Present (1)	Absent (0) / Present (1)	Absent (0) / Present (1)	Absent (0) / Present (1)	Absent (0) / Present (1)	Absent (0) / Present (1)	Absent (0) / Present (1)	Absent (0) / Present (1)	Absent (0) / Present (1)	No difference (0) / W>S (1) / S>W (2)	X < 10^3 (0) / 10^3 < X < 10^5 (1) / X > 10^5 (2)	Soft (0) / Intermediate (1) / Hard (2)	Soft (0) / Intermediate (1) / Hard (2)	Wood piece (0) / Soil Galeries (1) / Open Air (2)	Linear (0) / Bifurcated (1)	No (0)/ Yes (1)	No (0) / Yes (1)	Low (0) / Moderate (1) / High (2)	One-piece (0) / Intermediate (1) / Separate (2)	Wood (0) / Grass or leaf-litter (1) / Lichen (2) / Soil (3)	Small (0) / Mid-sized (1) / Large (2)	<5% (0) / 5-10 (1) / >10% (2)
1	Cryptocercus punctulatus Scudder, 1862	Cryptocercidae	Nearctic	Cleveland et al. 1934; Seelinger & Seelinger 1983; Bell et al. 2006	Cry		1	0	?	?	1	0	?	?	1	0	0	?	?	?	?	0	?	?	?	?	?	0	1	1	0	0	0	?	0	0	0	2	?	Cryptocercidae
2	Mastotermes darwiniensis Froggatt, 1897	Mastotermitidae	Australian	North Australia + Moore 1968; Delattre et al. 2015	MaD		1	1	1	1	1	0	1	0	1	1	0	1	1	0	1	1	1	0	1	1	0	2	2	2	0	1	0	0	0	1	0	2	1	Mastotermitidae
3	Hodotermopsis sjostedti Holmgren, 1911	Archotermopsidae	Indomalayan	Vietnam	HoS	18/2	0	1	0	1	0	1	0	1	1	1	0	1	1	0	1	0	?	?	?	?	2	1	2	2	0	0	0	0	0	1	0	2	0	Archotermopsidae + Hodotermitidae
4	Zootermopsis nevadensis (Hagen, 1874)	Archotermopsidae	Nearctic	Kirchner et al. 1994	ZoN		0	1	0	1	0	1	0	1	?	1	?	1	1	?	?	0	?	?	?	0	2	0	2	2	0	0	0	0	0	0	0	2	1	Archotermopsidae + Hodotermitidae
5	Hodotermes mossambicus (Hagen, 1853)	Hodotermitidae	Afrotropical	South Africa	HoM	18/2	0	0	0	0	0	0	0	0	0	0	0	0	0	0	1	0	?	?	?	?	2	2	0	0	2	1	0	0	0	2	1	2	0	Archotermopsidae + Hodotermitidae
6	Neotermes cubanus (Snyder, 1922)	Kalotermitidae	Neotropical	Cuba	NeC	30/3	1	0	1	0	1	0	1	0	1	0	0	1	0	0	1	0	?	?	?	?	2	0	2	2	0	0	0	1	1	0	0	1	1	Kalotermitidae
7	Incisitermes marginipennis (Latreille, 1817)	Kalotermitidae	Nearctic	Hertel et al. 2011, Šobotník unpubl.	InM		1	0	1	0	1	0	0	0	0	0	0	1	0	0	0	0	?	?	?	0	0	0	2	2	0	0	0	0	0	0	0	1	1	Kalotermitidae
8	Glossotermes oculatus Emerson, 1950	Serritermitidae	Neotropical	French Guiana	GlO	38/2	1	1	1	1	1	0	1	1	1	1	1	1	1	1	0	0	?	?	?	?	0	1	1	1	0	0	0	0	0	0	0	0	0	Rhinotermitidae + Serritermitidae
9	Prorhinotermes canalifrons (Sjöstedt, 1904)	Rhinotermitidae/Prorhinotermitinae	Neotropical	Šobotník et al. 2008	PrC		1	0	1	0	1	0	1	1	?	?	?	?	?	?	1	1	1	1	1	1	0	1	1	1	0	0	0	0	0	1	0	0	1	Rhinotermitidae + Serritermitidae
10	Coptotermes gestroi (Wasmann, 1896)	Rhinotermitidae/Coptotermitinae	Indomalayan	Hertel et al. 2011	CoG		1	0	1	1	0	0	0	1	?	?	?	?	1	?	1	?	?	?	?	?	0	2	2	2	0	1	0	0	0	2	0	0	1	Rhinotermitidae + Serritermitidae
11	Reticulitermes grassei Clément, 1977	Rhinotermitidae/Heterotermitinae	Palearctic	Reinhard & Clément 2002; Reinhard et al. 2003; Šobotník unpubl.	ReG		1	1	1	1	1	0	1	1	?	?	?	?	?	?	1	1	1	1	?	?	0	2	2	2	0	1	0	0	0	1	0	0	1	Rhinotermitidae + Serritermitidae
12	Reticulitermes lucifugus (Rossi, 1792)	Rhinotermitidae/Heterotermitinae	Palearctic	Reinhard & Clément 2002; Reinhard et al. 2003; Šobotník unpubl.	ReL		1	1	1	1	1	0	1	1	?	?	?	?	?	?	1	1	1	1	?	?	0	2	2	2	0	1	0	0	0	1	0	0	1	Rhinotermitidae + Serritermitidae
13	Reticulitermes banyulensis Clément, 1977	Rhinotermitidae/Heterotermitinae	Palearctic	Reinhard & Clément 2002; Reinhard et al. 2003; Šobotník unpubl.	ReB		1	1	1	1	1	0	1	1	?	?	?	?	?	?	1	1	1	1	?	?	0	1	2	2	0	1	0	0	0	1	0	0	1	Rhinotermitidae + Serritermitidae
14	Reticulitermes flavipes (Kollar, 1837)	Rhinotermitidae/Heterotermitinae	Palearctic	France	ReF	38/2	1	1	1	1	1	0	1	1	1	1	0	1	1	0	1	1	1	0	1	1	0	2	2	2	0	1	0	0	0	1	0	0	1	Rhinotermitidae + Serritermitidae
15	Pseudacanthotermes spiniger (Sjöstedt, 1900)	Termitidae/Macrotermitinae	Afrotropical	Connétable et al. 1999	PsS		0	0	0	1	0	0	0	1	?	?	?	?	1	?	1	?	?	?	?	?	2	2	2	1&2	0&2	1	1	1	2	2	0&1	1	0	Termitidae
16	Pseudacanthotermes militaris Hagen, 1858	Termitidae/Macrotermitinae	Afrotropical	Connétable et al. 1999	PsM		0	0	0	1	0	0	0	1	?	?	?	?	1	?	1	?	?	?	?	?	2	2	2	1&2	0&2	1	1	1	2	2	0&1	1	0	Termitidae
17	Macrotermes subhyalinus (Rambur, 1842)	Termitidae/Macrotermitinae	Afrotropical	Kettler & Leuthold 1995; Röhrig et al. 1999	MaS		1	0	0	1	0	0	0	1	?	?	?	?	1	?	1	?	?	?	?	?	2	2	2	1&2	0&2	1	1	1	2	2	0&1	2	0	Termitidae
18	Macrotermes bellicosus (Smeathman, 1781)	Termitidae/Macrotermitinae	Afrotropical	Kettler & Leuthold 1995; Röhrig et al. 1999	MaB		1	0	0	1	0	0	0	1	?	?	?	?	1	?	1	?	?	?	?	?	2	2	2	1&2	0&2	1	1	1	2	2	0&1	2	0	Termitidae
19	Termes hospes (Sjöstedt, 1900)	Termitidae/Termitinae	Afrotropical	Congo	TeH	38/2	1	1	1	1	1	0	1	0	1	1	1	1	1	1	0	0	?	?	?	?	0	2	1	0	1	1	0	0	0	2	3	0	0	Termitidae
20	Labiotermes labralis (Holmgren, 1906)	Termitidae/Syntermitinae	Neotropical	French Guiana	LaL	28/2	1	1	1	1	1	0	1	1	1	1	1	1	1	1	1	0	?	?	?	?	2	2	2	0	1	1	0	0	0	2	3	1	0	Termitidae
21	Constrictotermes cyphergaster (Silvestri, 1901)	Termitidae/Nasutitermitinae	Neotropical	Brazil + Cristaldo et al. 2015	CoC		1	1	1	1	1	0	1	0	1	1	1	1	1	1	0	1	1	1	1	1	1	2	1	0	2	1	0	0	0	2	2	0	2	Termitidae
